# Supplementary material for: New unsaturated copolyesters based on 2,5-furandicarboxylic acid and their crosslinked derivatives
Source: Royal Society of Chemistry journal article supplement (doi:10.1039/c5py01702e), 2015-11-30
Supplement: c5py01702e1.pdf [file c5py01702e1.pdf]

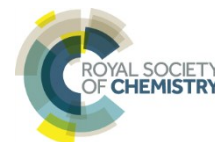

Journal Name

ARTICLE

**Electronic supporting information of the manuscript:**

Received 00th January 20xx,  
Accepted 00th January 20xx

DOI: 10.1039/x0xx00000x

[www.rsc.org/](http://www.rsc.org/)

**New unsaturated copolyesters based on 2,5-furandicarboxylic acid and their crosslinked derivatives**

A. F. Sousa,<sup>\*†a,b</sup> A. C. Fonseca,<sup>\*†b</sup> A. C. Serra,<sup>b</sup> C. S. R. Freire,<sup>a</sup> A. J. D. Silvestre<sup>a</sup> and J. F. J. Coelho<sup>b</sup>

**Table of contents**

|                                             |    |
|---------------------------------------------|----|
| 1. Structural characterisation of UPs       | S2 |
| 1.1 <sup>1</sup> H NMR analysis of UPs      | S2 |
| 1.2 1.2 <sup>13</sup> C NMR analysis of UP  | S2 |
| 2. Thermal properties of UPs and cured UPRs | S3 |

# 1. Structural characterisation of UPs

## 1.1 <sup>1</sup>H NMR analysis of UPs

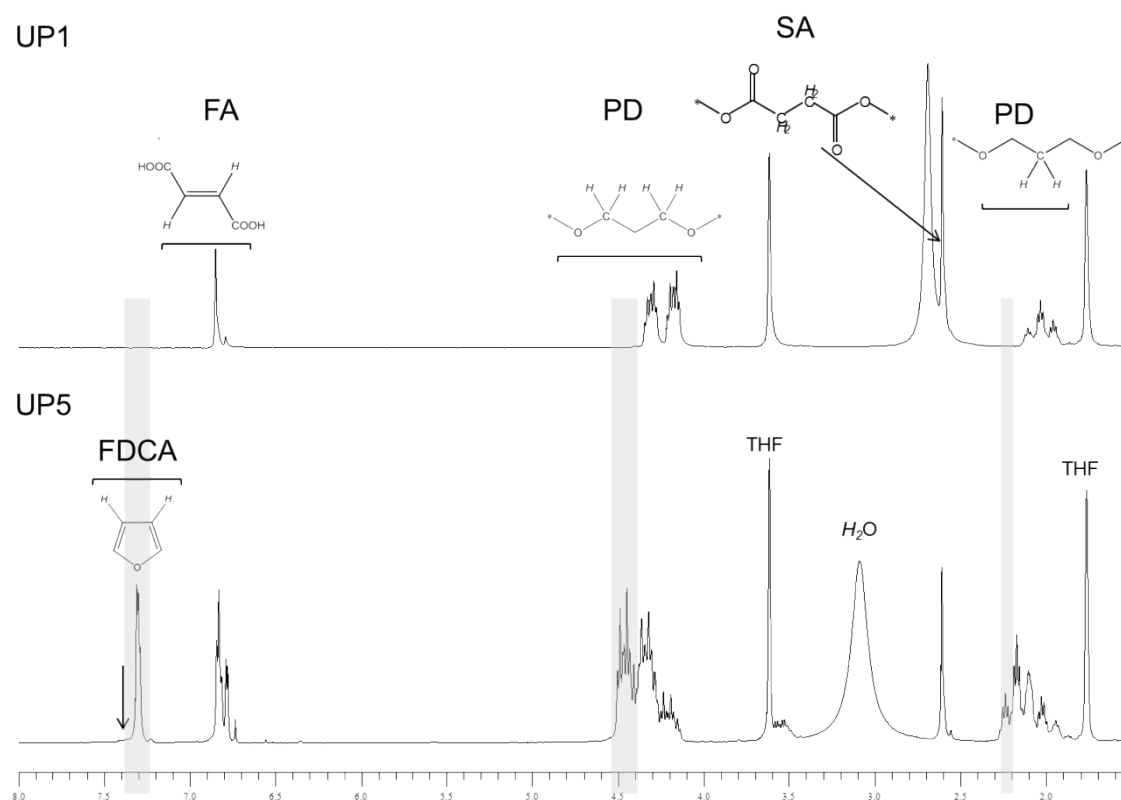

Fig. S1 <sup>1</sup>H NMR spectra of UP1 and UP5.

## 1.2 <sup>13</sup>C NMR analysis of UPs

Table S1 Main resonances from the <sup>13</sup>C NMR spectra of UP1-5 polyesters.

| assignment                                               | $\delta$ / ppm |      |      |     |     |
|----------------------------------------------------------|----------------|------|------|-----|-----|
|                                                          | UP1            | UP2  | UP3  | UP4 | UP5 |
| C=O, SA-PD                                               | 173            | 172  | 173  | 173 | 173 |
| C=O, FA-PD                                               | 165            | 165  | 165  | 165 | 165 |
| C=O, FDCA-PD                                             | -              | 158  | 158  | 159 | 158 |
| C2, C5; FDCA                                             | -              | n.d. | n.d. | 148 | 148 |
| =CH; FA-PD                                               | 134            | 134  | 134  | 134 | 134 |
| C3, C4; FDCA                                             | -              | 118  | 119  | 119 | 119 |
| OCH <sub>2</sub> , PD-FA, PD-FDCA                        | 63             | 63   | 63   | 63  | 63  |
| OCH <sub>2</sub> , PD-SA                                 | 62             | 62   | 62   | 62  | 62  |
| OCH <sub>2</sub> CH <sub>2</sub> , PD-SA, PD-FA, PD-FDCA | 29             | 29   | 30   | 30  | 30  |
| COCH <sub>2</sub> , SA-PD                                | 29             | 29   | 29   | 29  | 29  |

The <sup>13</sup>C NMR spectra of the prepared UPs (Table S1) are consistent with the main <sup>1</sup>H NMR features, described earlier, displaying accordingly relevant resonances at, viz.:  $\delta \sim 172$ , 165 and 158 ppm arising from the carbon resonance typical of carbonyl ester groups of SA, FA and FDCA, respectively, typical of esters. Moreover the UPs spectra also display resonances associated with the PD units in different chemical environments at approximately  $\delta$  63 and 62 ppm arising from OCH<sub>2</sub> carbon of PD-FA and PD-FDCA, and PD-SA diads, respectively. These attributions are corroborated with literature data on a similar polyester.<sup>42</sup>

## 2. Thermal properties of UPs and cured UPRs

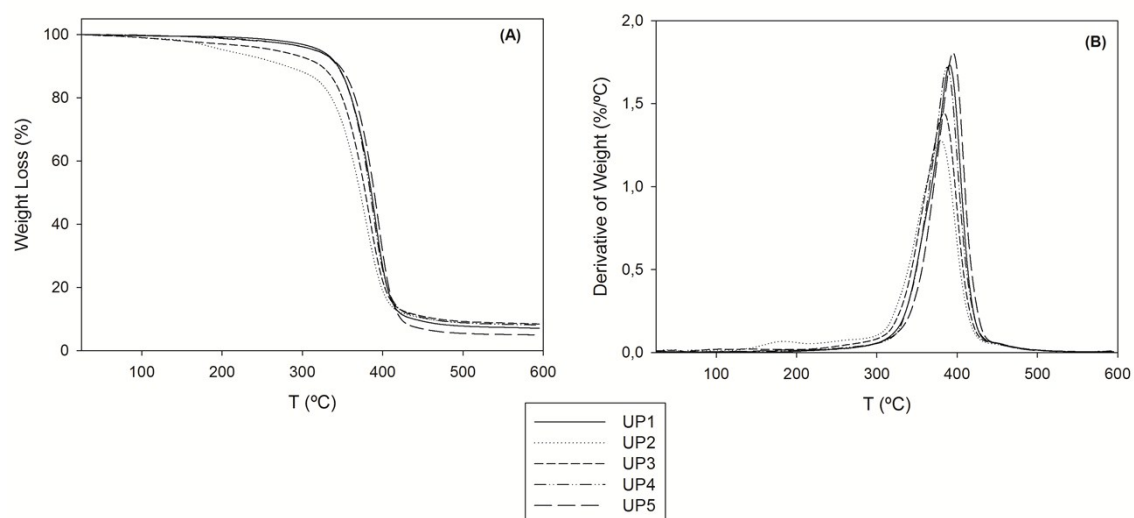

Fig. S2 Thermogravimetric curves of the UPs: (A) TG; and (B) DTG.

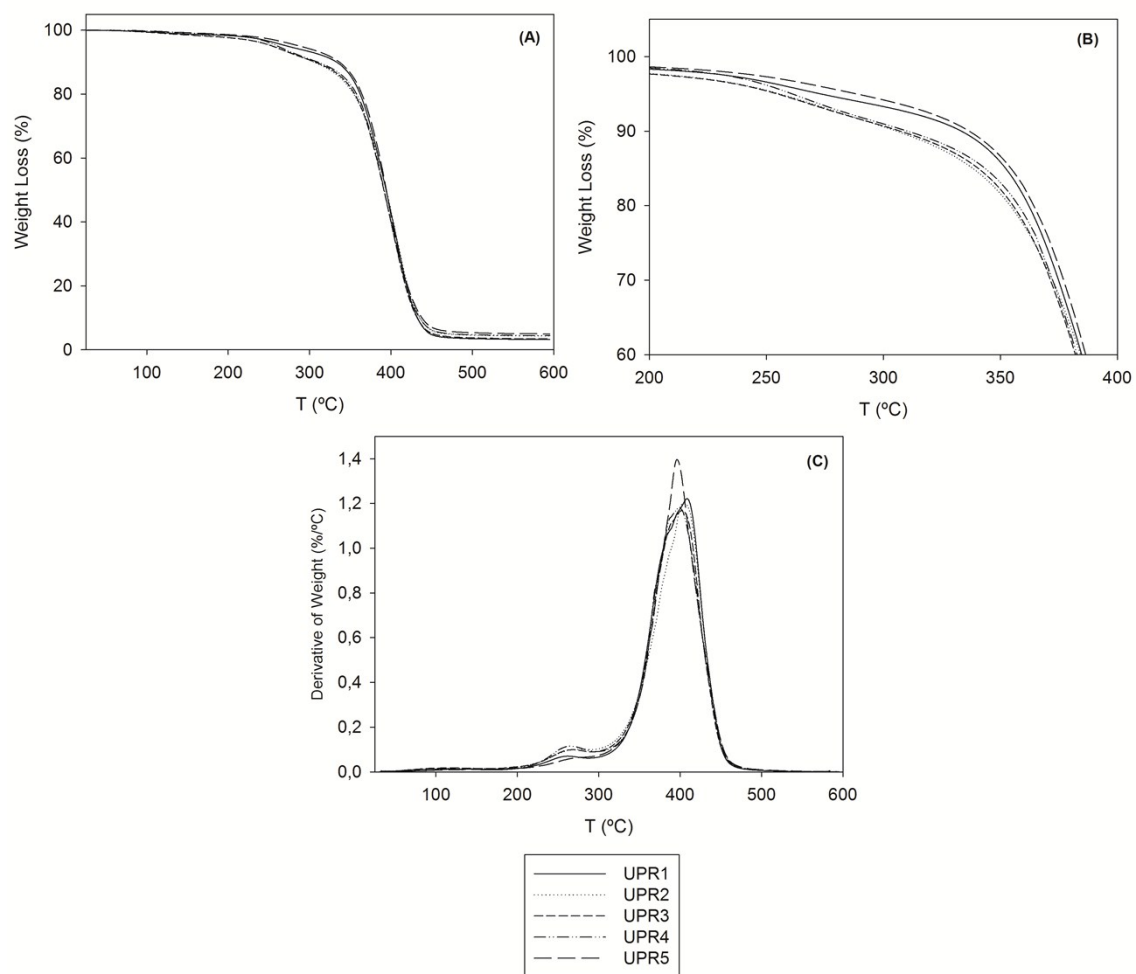

Fig. S3 Thermogravimetric curves of the UPRs: (A) TG; (B) inset of the TG curve; and (C) DTG.

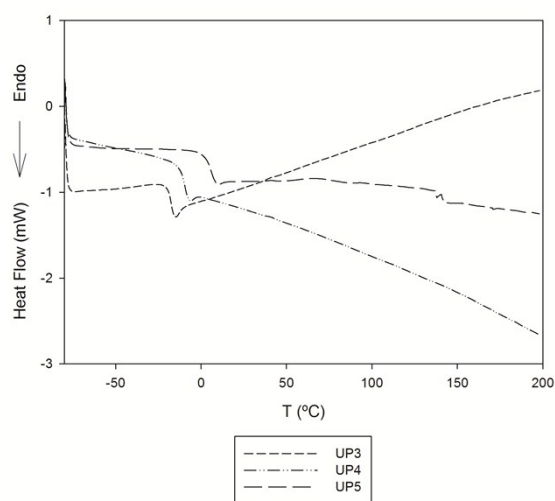

Fig. S4 Heat Flow curves of the UP3, UP4, and UP5.
